# Supplementary material for: Direct regeneration method of spent LiNi1/3Co1/3Mn1/3O2 cathode materials via surface lithium residues
Source: Royal Society of Chemistry journal article supplement (doi:10.1039/d1gc03526f), 2021-01-01
Supplement: d1gc03526f1.pdf [file d1gc03526f1.pdf]

## Supporting information

### Direct regeneration method of spent $\text{LiNi}_{1/3}\text{Co}_{1/3}\text{Mn}_{1/3}\text{O}_2$ cathode materials via surface lithium residues

Zhexi Chi<sup>a</sup>, Jian Li<sup>a,c,\*</sup>, Lihua Wang<sup>b,c,\*</sup>, Tengfei Li<sup>a</sup>, Ya Wang<sup>a</sup>, Yunyun Zhang<sup>a</sup>, Shengdong Tao<sup>a</sup>, Minchao Zhang<sup>a</sup>, Yihua Xiao<sup>a</sup>, Yongzhi Chen<sup>b</sup>

Table S1. Atomic percentage of Li, Ni, Co and Mn in S-NCM, R-NCM800, R-NCM850 and R-NCM900 respectively.

| Samples  | Li   | Ni   | Co   | Mn   |
|----------|------|------|------|------|
| S-NCM    | 7.53 | 17.9 | 21   | 17   |
| R-NCM800 | 7.81 | 17.9 | 21.5 | 18.2 |
| R-NCM850 | 7.81 | 18.7 | 22   | 18   |
| R-NCM900 | 7.13 | 18.8 | 22.5 | 18.9 |

Table S2. Molar ratio of Li, Ni, Co and Mn in S-NCM, R-NCM800, R-NCM850 and R-NCM900, respectively.

| Samples  | Li    | Ni    | Co    | Mn    | Formula                                                                                |
|----------|-------|-------|-------|-------|----------------------------------------------------------------------------------------|
| S-NCM    | 1.085 | 0.304 | 0.356 | 0.309 | $\text{Li}_{1.085}\text{Ni}_{0.304}\text{Co}_{0.356}\text{Mn}_{0.309}\text{O}_{1.999}$ |
| R-NCM800 | 1.125 | 0.304 | 0.364 | 0.331 | $\text{Li}_{1.125}\text{Ni}_{0.304}\text{Co}_{0.364}\text{Mn}_{0.331}\text{O}_{2.075}$ |
| R-NCM850 | 1.125 | 0.318 | 0.373 | 0.327 | $\text{Li}_{1.125}\text{Ni}_{0.318}\text{Co}_{0.373}\text{Mn}_{0.327}\text{O}_{2.094}$ |
| R-NCM900 | 1.027 | 0.32  | 0.381 | 0.344 | $\text{Li}_{1.027}\text{Ni}_{0.320}\text{Co}_{0.381}\text{Mn}_{0.344}\text{O}_{2.093}$ |

The Li content in S-NCM measured by ICP-OES was 1.08 mole, which is mainly attributed to the over-discharge process to 2.0V before the dismantlement of spent LIBs. Based on the voltage variations, that over-discharge process was ascribed

into first stage which voltage would drop rapidly. And it is due to over-discharge which causes  $\text{Li}^+$  to be deintercalated from the anode and inserted into the cathode.<sup>1</sup> Consequently, the Li content in S-NCM materials would show quite an increase after that pre-treatment owing to the insertion of  $\text{Li}^+$ . While the components of S-NCM also contain some lithium-containing impurities besides active layered-structure materials, including LiF and lithium carbonate after long-term cycles,<sup>2</sup> which can be confirmed with FT-IR and TG-DSC tests. The lithium residues on the surface are partly attributed to the side-reaction between the positive electrode material and the electrolyte. According to previous study, it has been proven that soluble lithium salts such as  $\text{Li}_2\text{CO}_3$  and LiOH can act as Li source to supply Li deficiency in material lattice to enhance the integrity of layered structure of NCM materials.<sup>3, 4</sup> Besides, lithium-containing compounds would decompose during high-temperature calcination, which could react with NiO to remove those impurities with poor conductivity. With that recrystallization of layered NCM structures under  $\text{O}_2$  atmosphere to avoid oxygen loss, it would be favorable for transport kinetics for both lithium ions and electrons, improving its electrochemical performance. Based on this fact, here we proved that these surface lithium residues could be recycled to regenerate spent NCM materials without other consumption.

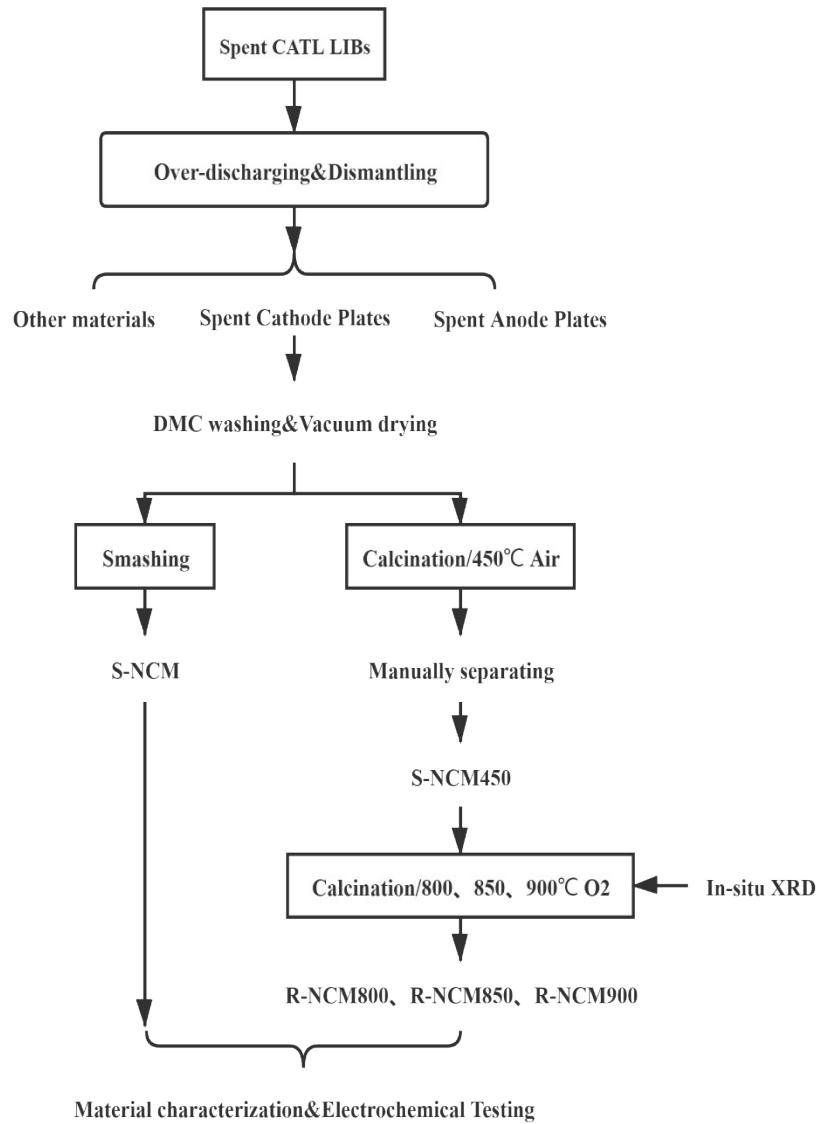

Figure S1. Schematic diagram for experimental process.

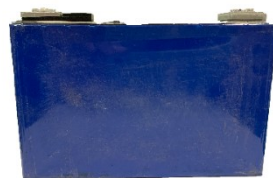

Figure S2. Spent prismatic lithium-ion batteries.

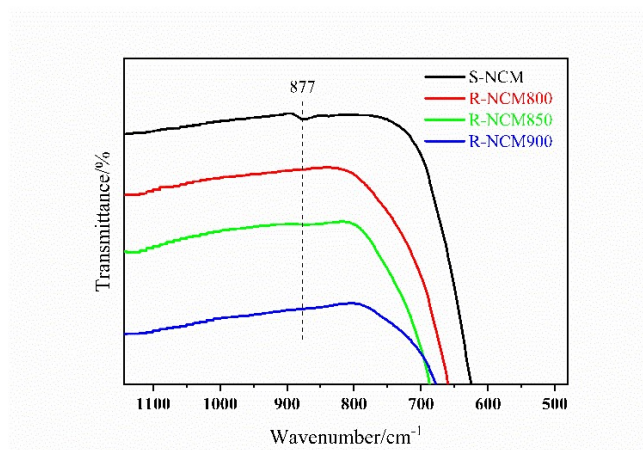

Figure S3. Enlarged FT-IR images of spent and regenerated NCM materials.

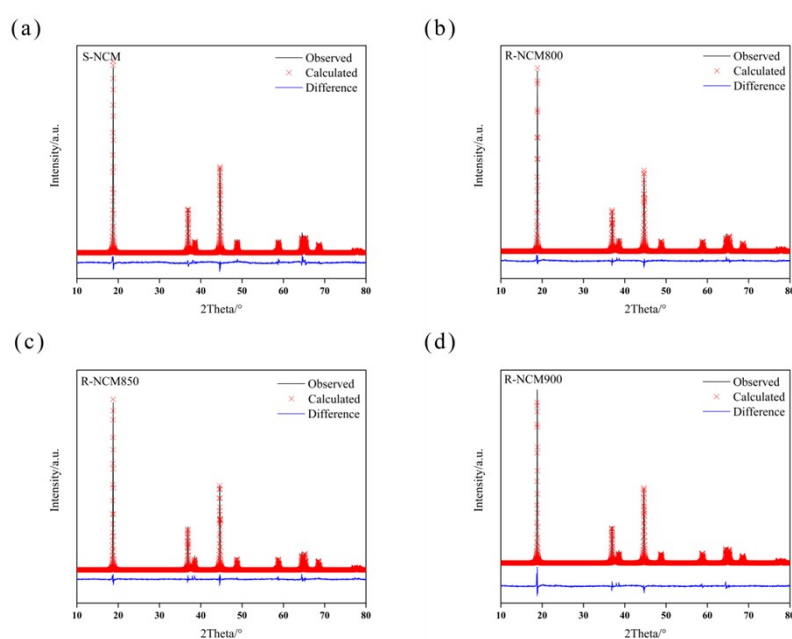

Figure S4. Rietveld refinement of ex-situ XRD patterns of (a)S-NCM, (b)R-NCM800, (c)R-NCM850 and (d) R-NCM900.

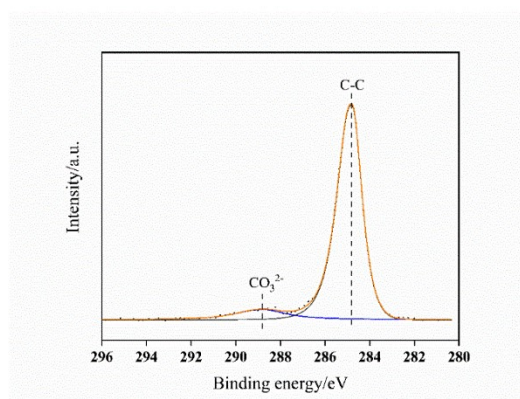

Figure S5. Enlarged C1s XPS spectrum of S-NCM450.

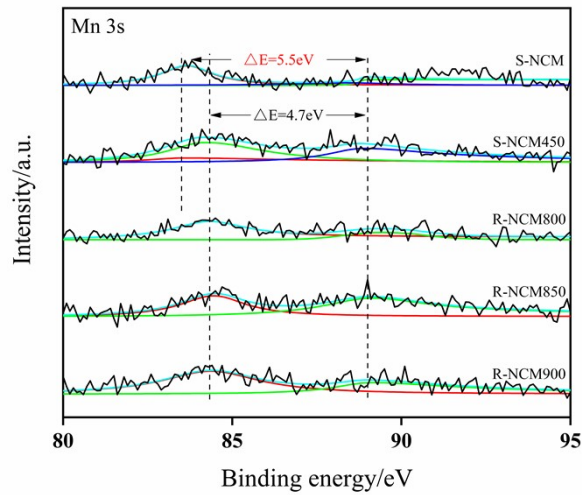

Figure S6. XPS spectra of Mn 3s of S-NCM and R-NCM.

As shown in Fig.S6, all of these samples show two splitting distinct peaks at 89.0 eV and 84.3 eV, which corresponds to  $Mn^{4+}$ . Besides, there also shows a distinct peak at 83.5 eV attributed to  $Mn^{3+}$ .<sup>5</sup> The XPS spectra of Mn 3s is consistent with the results of Mn 2p.

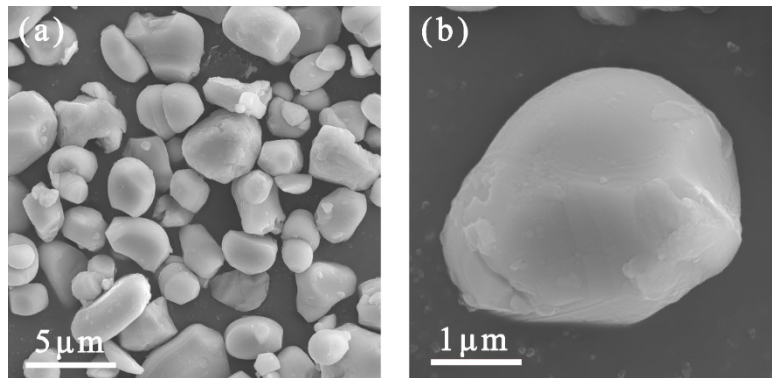

Figure S7. SEM images of S-NCM450 at different resolution.

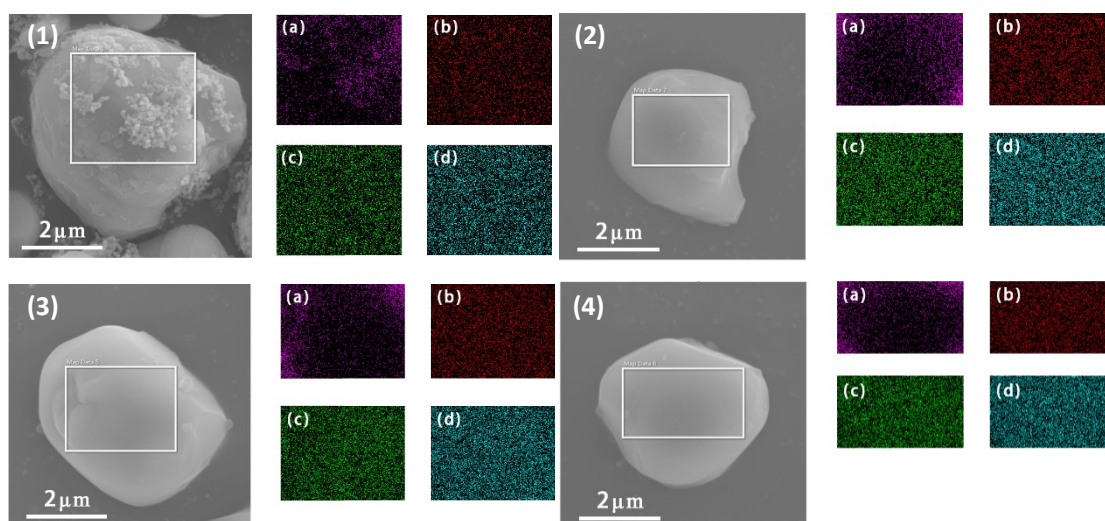

Figure S8. EDX elemental mappings of (1)S-NCM, (2)R-NCM800, (3)R-NCM850 and (4)R-NCM900 corresponding to (a) C, (b) Ni, (c) Co, (d) Mn, respectively.

Table S3. Comparison of the electrochemical performances of R-NCM850 with other reported regenerated materials with additional lithium compounds.

| Rate | <b>R-NCM850</b><br><b>2.8-4.3V</b> | NCM<br>(ref6, Li <sub>2</sub> CO <sub>3</sub> )<br>2.7-4.3V | NCM<br>(ref7, CH <sub>3</sub> COOLi)<br>2.8-4.3V | NCM<br>(ref8, Li <sub>2</sub> CO <sub>3</sub> )<br>2.7-4.3V |
|------|------------------------------------|-------------------------------------------------------------|--------------------------------------------------|-------------------------------------------------------------|
| 0.2  | <b>156.2</b>                       | 148.8                                                       | 151.6                                            | --                                                          |
| 0.5  | <b>145.6</b>                       | 141.6                                                       | 145.7                                            | 150                                                         |
| 1    | <b>139.2</b>                       | 132.9                                                       | 138.3                                            | 145                                                         |
| 5    | <b>115.6</b>                       | --                                                          | 120.6                                            | 100                                                         |

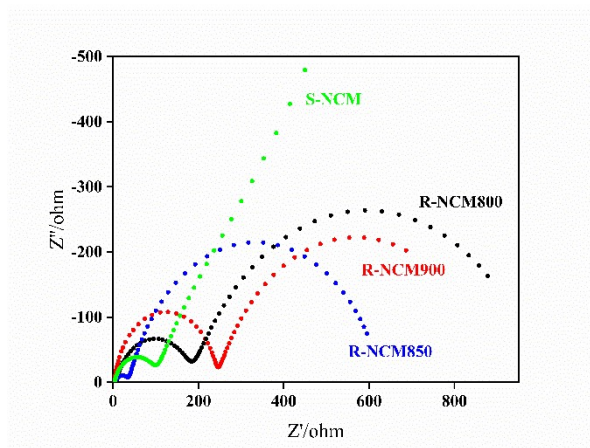

Figure S9. Enlarged Nyquist plots of S-NCM, R-NCM800, R-NCM850 and R-NCM900 at high frequency area.

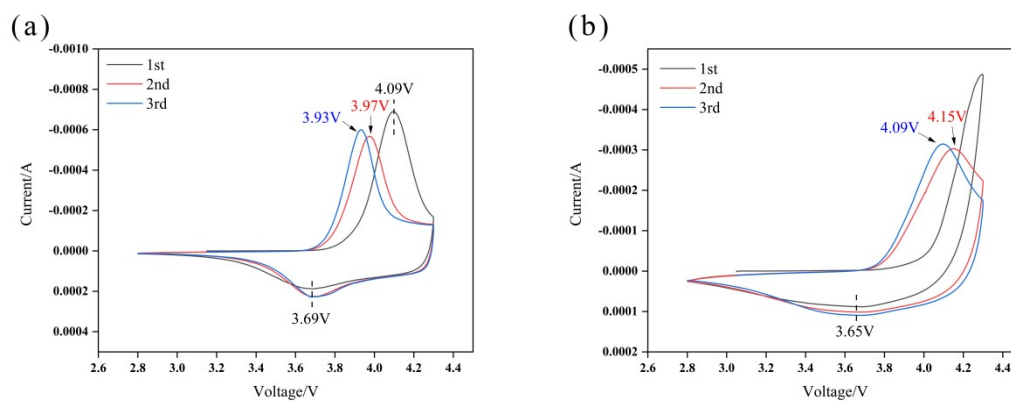

Figure S10. Cyclic voltammograms of (a)R-NCM800 and (b)R-NCM900 during the first 3 cycles.

Table S4. Material consumption to direct regenerate or synthesize 1kg NCM111 cathode materials

|                                      | Direct<br>regeneration | Synthesized[ref] |
|--------------------------------------|------------------------|------------------|
| NiSO <sub>4</sub> /kg                | --                     | 0.5348           |
| CoSO <sub>4</sub> /kg                | --                     | 0.5356           |
| MnSO <sub>4</sub> /kg                | --                     | 0.5218           |
| Spent cathode<br>materials/kg        | 1.2                    | --               |
| Li <sub>2</sub> CO <sub>3</sub> /kg  | --                     | 0.4021           |
| H <sub>2</sub> O/kg                  | --                     | 5.1835           |
| NaOH/kg                              | --                     | 0.6220           |
| NH <sub>3</sub> ·H <sub>2</sub> O/kg | --                     | 0.5449           |
| DMC/kg                               | 0.3(reused)            | --               |

## References

- 1 R. Guo, L. Lu, M. Ouyang and X. Feng, Scientific reports, 2016, 6, 1-9.
- 2 M. Dubarry, C. Truchot, B. Y. Liaw, K. Gering, S. Sazhin, D. Jamison and C. Michelbacher, Journal of Power Sources, 2011, 196, 10336-10343.
- 3 K. Liu, S. Yang, F. Lai, H. Wang, Y. Huang, F. Zheng, S. Wang, X. Zhang and Q. Li, ACS Applied Energy Materials, 2020, 3, 4767-4776.
- 4 T. Ma, Z. Guo, Z. Shen, Q. Wu, Y. Li and G. Yang, Journal of Alloys and Compounds, 2020, 848, 156591.
- 5 E. S. Ilton, J. E. Post, P. J. Heaney, F. T. Ling and S. N. Kerisit, Applied Surface Science, 2016, 366, 475-485.
- 6 R. Zheng, W. Wang, Y. Dai, Q. Ma, Y. Liu, D. Mu, R. Li, J. Ren and C. Dai, Green Energy Environ., 2017, 2, 42-50.
- 7 Y. Yang, S. Xu and Y. He, Waste Management, 2017, 64, 219-227.
- 8 L. Li, E. Fan, Y. Guan, X. Zhang, Q. Xue, L. Wei, F. Wu and R. Chen, ACS Sustain. Chem. Eng., 2017, 5, 5224-5233.
